# Supplementary material for: Real-time monitoring and actuation of a hybrid siphon valve for hematocrit-independent plasma separation from whole blood
Source: Royal Society of Chemistry journal article supplement (doi:10.1039/d3an00862b), 2023-01-01
Supplement: d3an00862b1.pdf [file d3an00862b1.pdf]

23 **Figure S2: Designed and manufactured disc for evaluating effect of parameters on siphon valve**  
24 **performance**

25

**$n_1$ : Siphon valve1**

**$n_2$ : Siphon valve2**

**$n_3$ : Siphon valve3**

**$n_4$ : Siphon valve4**

**$n_5$ : Siphon valve5**

**$n_6$ : ....**

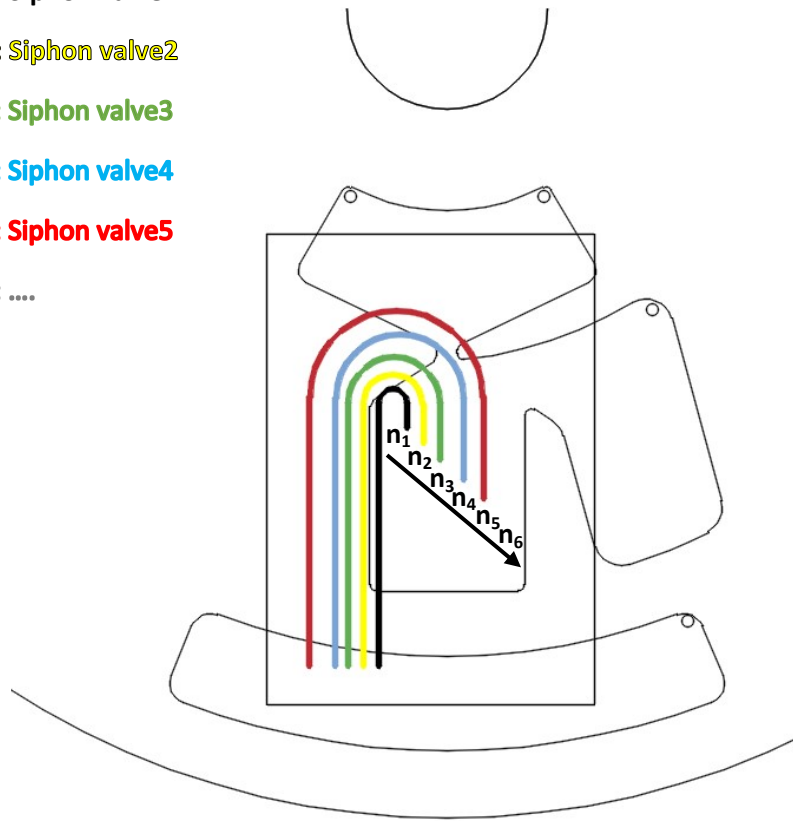

26

27

28

29

30

31

32

33

34 **Figure S3: Designed and manufactured disc for evaluating effect of parameters on siphon valve**  
35 **performance**

36 To validate **Equation 6**, we designed various models of siphon valves including main chamber with a depth  
37 of 1mm, a siphon microchannel, and a secondary chamber with a depth of 1.5 mm. The microchannel had  
38 a width of 1mm and a height of 0.1 mm.

39 We designed a siphon valve with  $R_\theta = 22.8\text{mm}$  and  $R_C = 19.8\text{mm}$  to investigate how the contact angle and  
40 fluid viscosity affect the valve's performance. To explore the effect of  $R_\theta$  and  $R_C$  on the valve's performance,  
41 we varied these parameters between 21.3 to 25.8 mm and 16.8 to 22.5 mm, respectively, while holding all  
42 other parameters constant.

43

44

45

46

47

48

49

50

51

52

53

54

55

56

57

58

59

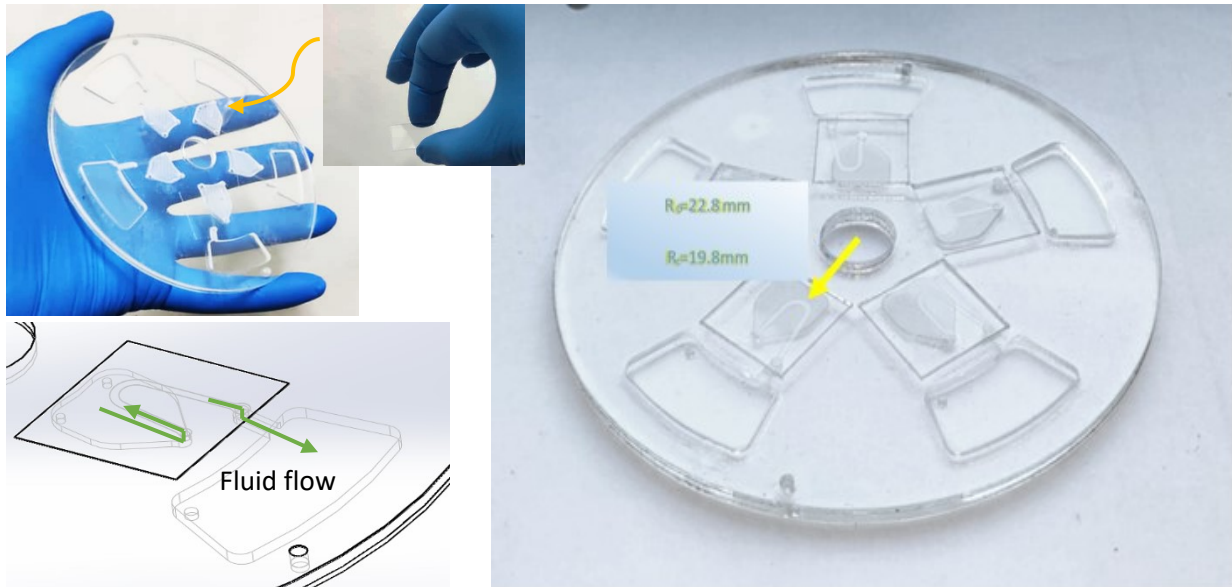

60 **Figure S4: Fabrication techniques**

61 There are two methods for manufacturing the discs. The first method, laser cutting, involves using seven  
62 layers (**Figure S3a**). This approach avoids tool marks and reduces fabrication time. The second method,  
63 which uses CNC machining and is shown in **Figure S3b**, involves five layers. This method increases the  
64 accuracy and precision of fabrication, reduces the weight of the disc, and lowers material costs.

65

66

67

68

69

70

71

72

73

74

75

76

77

78

79

80

81

82

83

84

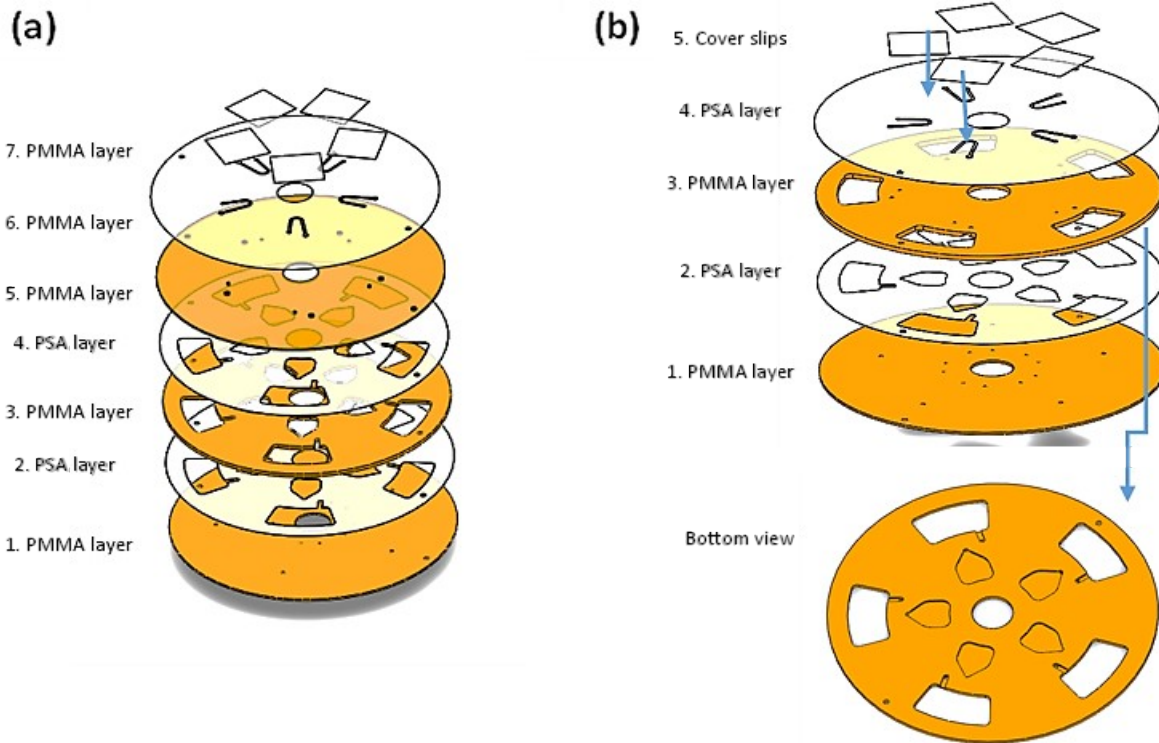

85 **Figure S5: Experimental Setup**

86 A custom-built centrifugal platform, specifically the CD Imager K1000 from Key Lead Solutions Inc in  
87 San Francisco, CA, USA, was employed for real-time monitoring of fluid motion. The platform featured a  
88 servomotor (1) with a velocity range of 50 to 8000 rpm and a resolution of 1 rpm, as well as a strobe light,  
89 low exposure time, and high-quality Zeiss camera (2) for capturing fluid dynamics. By connecting the  
90 centrifugal disc to the servomotor's shaft (3), a velocity-time profile could be applied using dedicated  
91 software. The resulting fluid motion within the disc was then evaluated and observed on the screen (4) to  
92 analyze its behavior and dynamics.

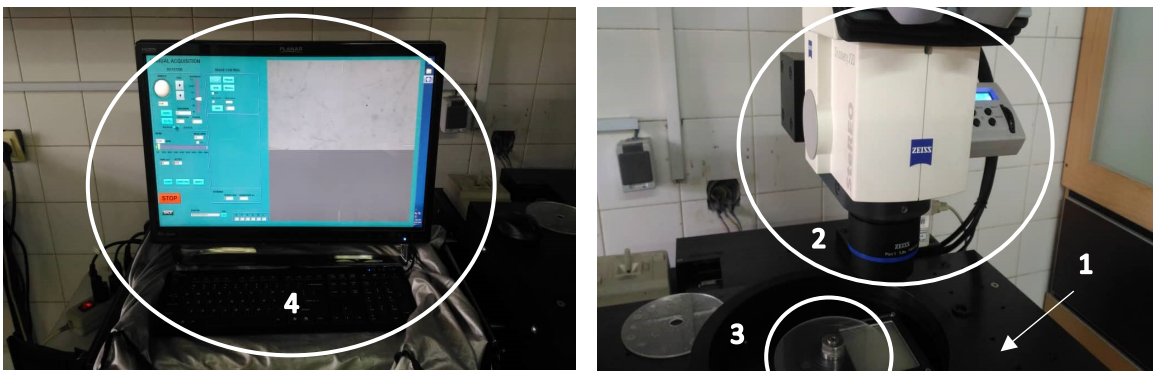

93

94

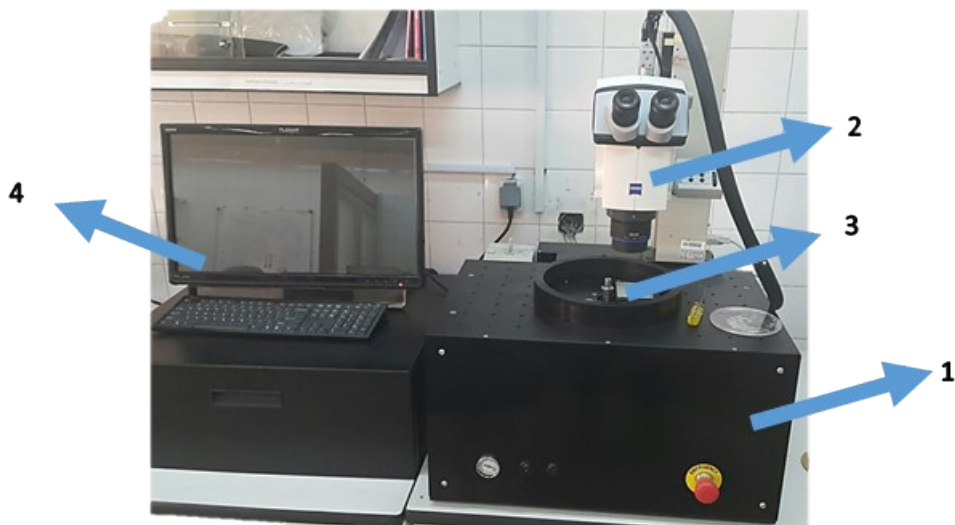

95

96

97
